# Supplementary material
Source: PubMed Central journal article supplement (PMC2997374)
Supplement: mmc1.pdf [file mmc1.pdf]

**The American Journal of Human Genetics, Volume 87**

**Supplemental Data**

**Whole-Exome-Sequencing-Based Discovery**

**of Human FADD Deficiency**

**Alexandre Bolze, Minji Byun, David McDonald, Neil V. Morgan, Avinash Abhyankar, Lakshmanane Premkumar, Anne Puel, Chris M. Bacon, Frédéric Rieux-Laucat, Ki Pang, Alison Britland, Laurent Abel, Andrew Cant, Eamonn R. Maher, Stefan J. Riedl, Sophie Hambleton, and Jean-Laurent Casanova**

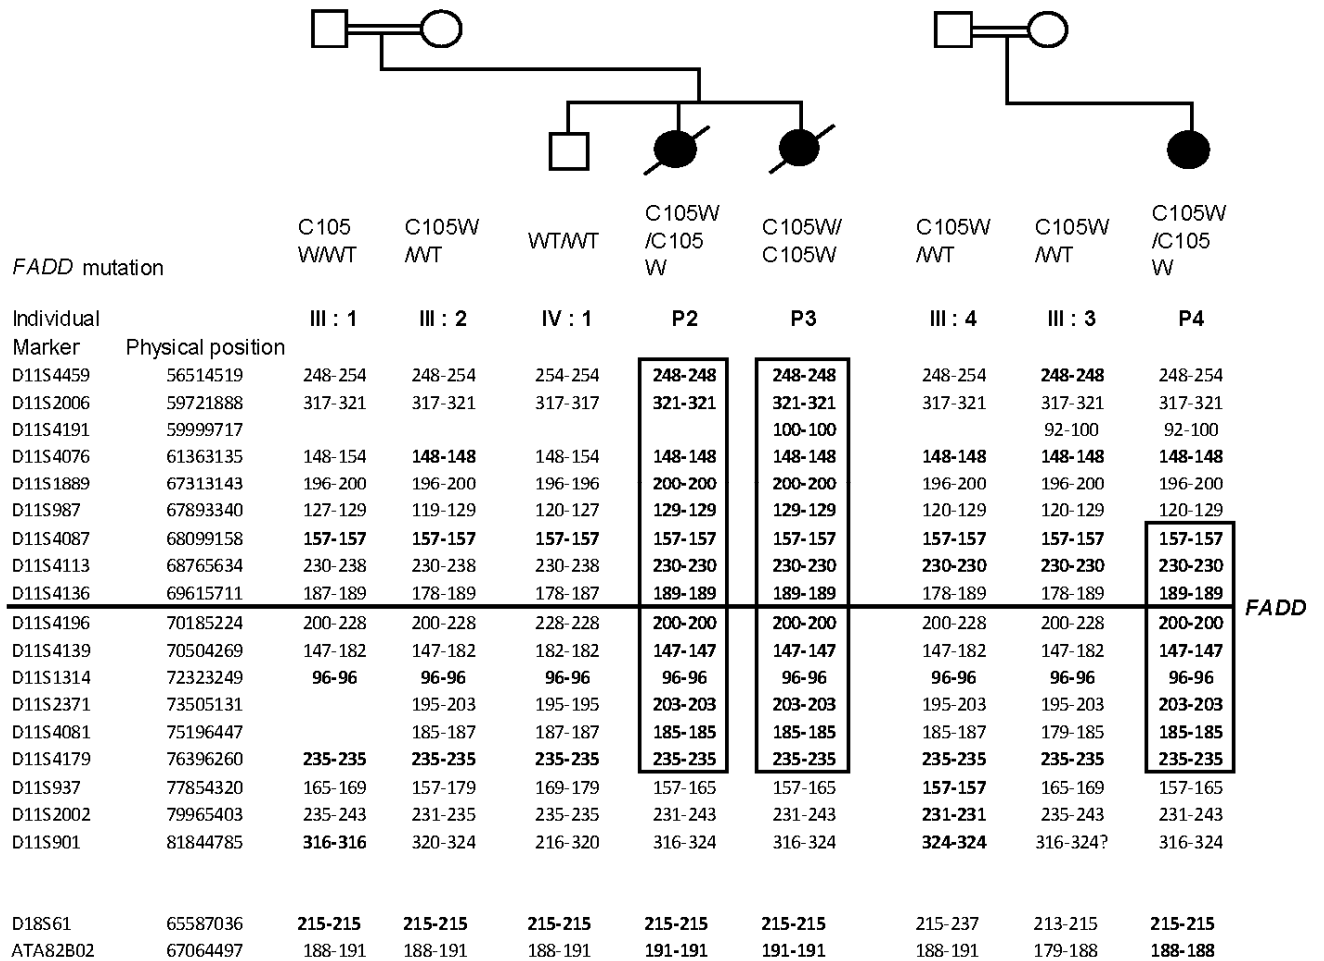

**Figure S1. Haplotypes of Microsatellites Sequenced Inside the Two Linked Regions on Chromosome 11 and Chromosome 18**

18 microsatellites were sequenced in the chromosome 11 region and 2 in the chromosome 18 region. In bold, microsatellites with a homozygous haplotype. And inside frames are homozygous stretches found by linkage analysis. The black line is here to locate the position of FADD.

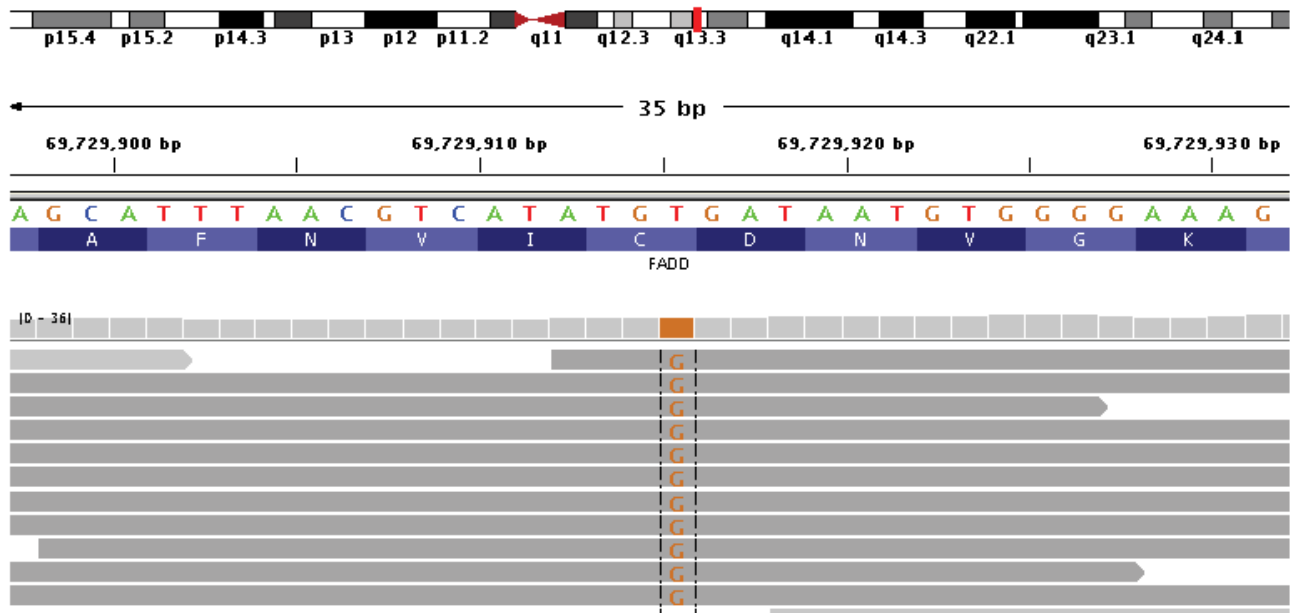

**Figure S2. Illumina Sequencing Reads Displayed for Patient P3**

Reads overlapping the mutation in exon 2 of FADD (bp position g.69,729,880 – g.69,729,949, hg18, NCBI 36.1) show the homozygous T>G base pair substitution.

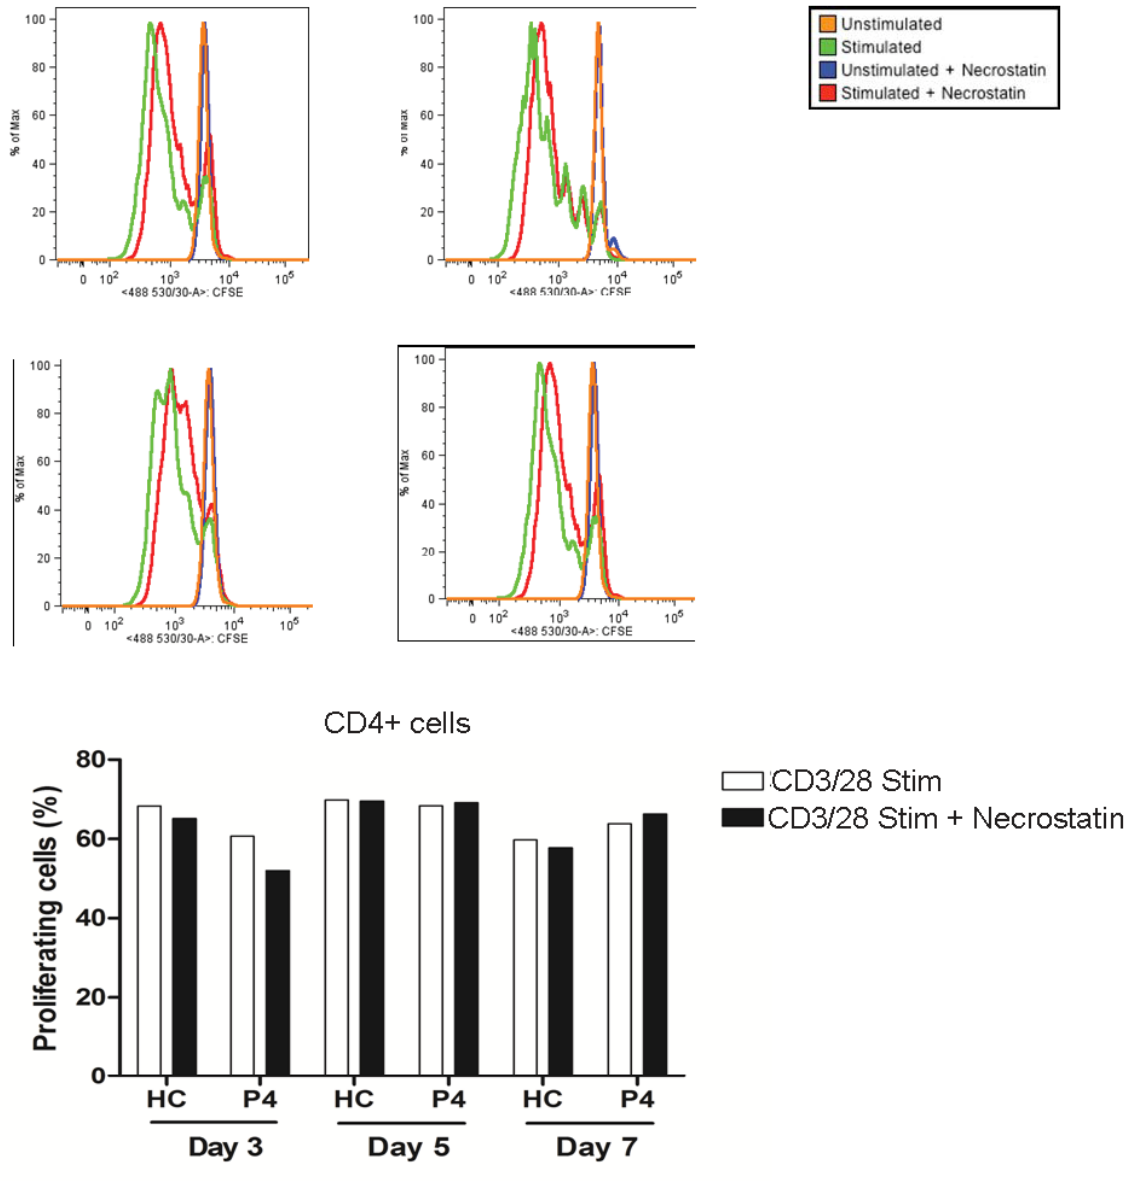

**Figure S3. CFSE Proliferation Assay after CD3/28 Stimulation**

Here results on CD4+ cells are represented. Similar results were obtained on CD8+ cells. Histograms are representative of two experiments. In the bar graph, the % of proliferating cells is the difference between the percentage of proliferating cells after stimulation by CD3/28 and the percentage of proliferating cells at the same time without stimulation. Black bars represent experiments with necrostatin-1 to block necroptosis.

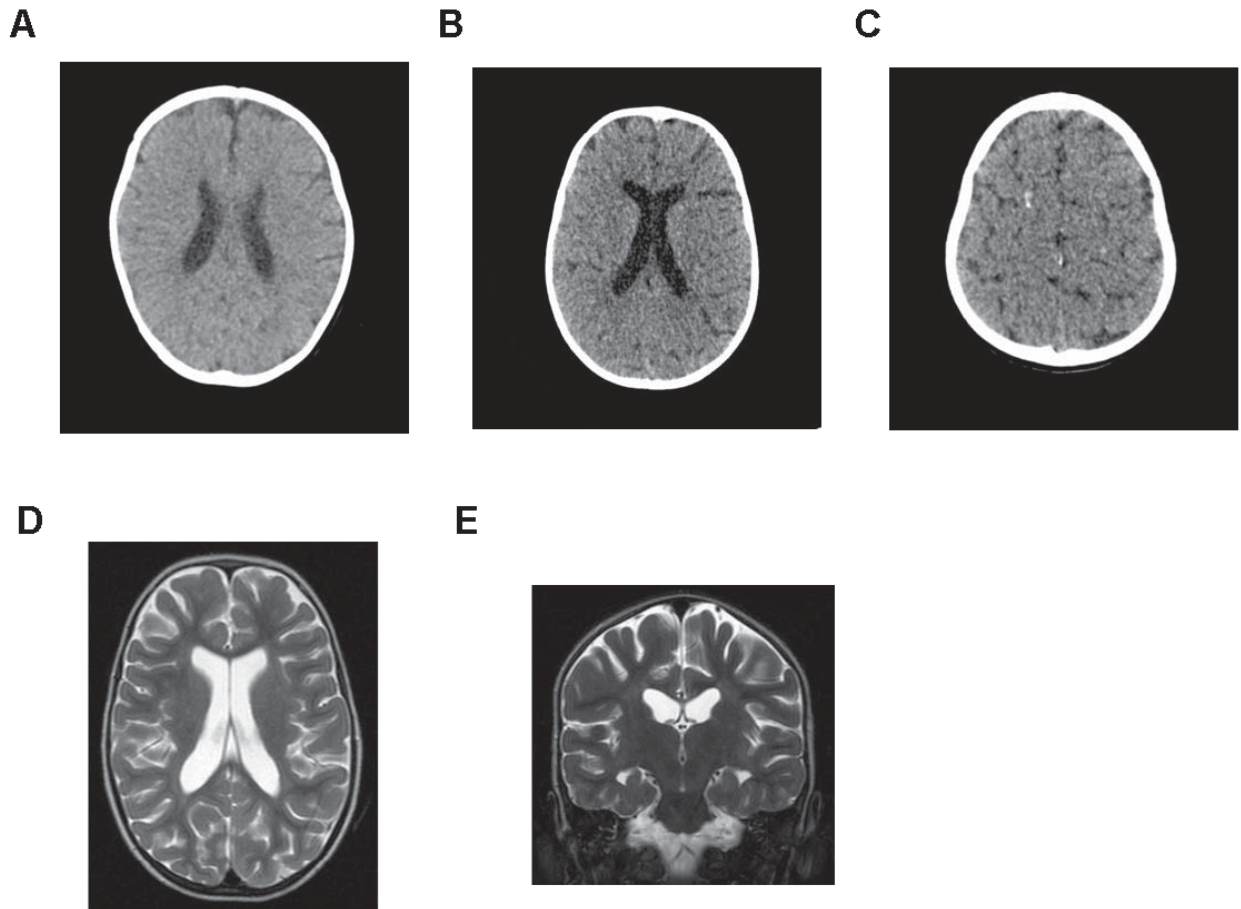

**Figure S4. Cranial Imaging in P4 at 5 and 29 Months**

(A) Axial CT at 5 months of age. (B-C) Axial CT at 29 months. (B) shows slightly more ex vacuo dilatation of the ventricles and prominent sulci. (C) shows a calcified area in the right cortex and a smaller spot on the left which were not present in previous scans. (D-E) T2-weighted MRI at 29 months. ((D), axial view; (E), coronal view) showing mild global atrophy in keeping with CT appearances. These progressive changes are indicative of an active process.

**Table S1. Lymphocyte Subsets and Serum Immunoglobulins**

| Subject                                 | P4<br>(2 years) | P4<br>(13 months <sup>a</sup> ) | P3<br>(8 months <sup>a</sup> ) | P2<br>(9 months) | Normal<br>range<br>(2 years) |
|-----------------------------------------|-----------------|---------------------------------|--------------------------------|------------------|------------------------------|
| <b>Total lymphocytes (cells/uL)</b>     | 10116           | 10259                           | 11905                          | 12670            | 2000 - 8000                  |
| CD3+ (T cells) (% lymphocytes)          | 7330 (73)       | 7719 (75)                       | 8446 (71)                      | 9124 (72)        | 900 – 4500                   |
| CD16+CD56+ (NK cells) (% lymphocytes)   | 581 (6)         | 553 (5)                         | 1292 (11)                      | 760 (6)          | 100 – 1000                   |
| CD19+ (B cells) (% lymphocytes)         | 2072 (21)       | 1858 (18)                       | 1957 (17)                      | 2281 (18)        | 200 – 2100                   |
| <b>Phenotype of CD3+</b>                |                 |                                 |                                |                  |                              |
| CD4 (% total lymphs)                    | 5023 (50)       | 5536 (54)                       | 6454 (53)                      | 6589 (52)        | 500 – 2400                   |
| CD8 (% total lymphs)                    | 1556 (15)       | 1520 (15)                       | 1824 (15)                      | 2534 (20)        | 200 – 1600                   |
| CD4/CD8 ratio                           | 3.23            | 3.64                            | 3.54                           | 2.6              | 0.9 – 2.9                    |
| CD4-CD8-TCR $\alpha\beta$ + (% T cells) | 7.8             | 5                               |                                |                  | <2.5                         |
| activated T cells (% T cells) (HLADR+)  | 30              | 15                              | 12                             |                  |                              |
| CD4+ naïve (% T cells) (CD45RA/CD27)    | 1906 (26)       | 2856 (37)                       |                                |                  |                              |
| CD4- naïve (% T cells)                  | 1539 (21)       | 1853 (24)                       |                                |                  |                              |
| <b>Phenotype of B cells</b>             |                 |                                 |                                |                  |                              |
| CD27-IgM+IgD+ (naïve B cells)           | 81              | 91                              |                                |                  |                              |
| CD27+IgM+IgD+ (memory B cells)          | 2               | 3                               |                                |                  |                              |
| CD27+IgM-IgD- (class switched)          | <1              | <1                              |                                |                  |                              |
| <b>Serum immunoglobulins (g/L)</b>      |                 |                                 |                                |                  |                              |
| IgG                                     | 8.2             | 10.7                            | 7.72                           | 5.15             | 4.9 – 16.1                   |
| IgA                                     | 0.45            | 0.32                            | 0.47                           | 0.33             | 0.4 – 2.0                    |
| IgM                                     | 0.32            | 0.22                            | 0.56                           | 0.63             | 0.5 – 2.0                    |
| <b>Vaccine-specific immunoglobulins</b> |                 |                                 |                                |                  | <b>(protective)</b>          |
| Tetanus (IU/ml)                         | 0.74            | 0.4                             | 2.19                           |                  | >0.1                         |
| Haemophilus influenzae (mg/L)           | 0.5             | >9.0                            | >9.0                           |                  | >1.0                         |
| Pneumococcal serotype-specific (mg/L):  |                 |                                 |                                |                  |                              |
| 4                                       |                 | 10.75                           | 1.14                           |                  | >0.35                        |
| 6B                                      |                 | 4.75                            | 0.67                           |                  | >0.35                        |
| 9V                                      |                 | 24.95                           | 0.85                           |                  | >0.35                        |
| 14                                      |                 | 0.86                            | 1.19                           |                  | >0.35                        |
| 18C                                     |                 | 16.62                           | 0.87                           |                  | >0.35                        |
| 19F                                     |                 | 1.17                            | 2.42                           |                  | >0.35                        |
| 23F                                     |                 | 20.48                           | 1.38                           |                  | >0.35                        |

<sup>a</sup> Serum immunoglobulins in P3 were assessed at 5 months of age; pneumococcal subtype-specific responses were obtained one month after the last dose of conjugate vaccine, aged 3.5 yrs (P3) or 13 months (P4)

**Table S2. Whole-Exome-Sequencing Results**

|                                |                                          |               |
|--------------------------------|------------------------------------------|---------------|
| Total number of reads          |                                          | 24,989,074    |
| Uniquely Mapped reads          |                                          | 17,816,126    |
| Total variants called          |                                          | 23,146        |
| Substitutions                  | Total (novel <sup>a</sup> )              | 21,224 (1796) |
|                                | Synonymous                               | 9,936         |
|                                | Nonsense                                 | 71            |
|                                | Missense                                 | 8,121         |
|                                | Splice-site                              | 37            |
|                                | Non-coding RNAs                          | 58            |
| Indels                         |                                          | 1,922         |
| dbSNP rate <sup>b</sup>        |                                          | 91.54%        |
| dbSNP concordance <sup>b</sup> |                                          | 99.71%        |
| chromosome 11 region           | Total <sup>c</sup> (novel <sup>a</sup> ) | 67 (8)        |
|                                | Synonymous (novel <sup>a</sup> )         | 26 (1)        |
|                                | Nonsense (novel <sup>a</sup> )           | 0 (0)         |
|                                | Missense (novel <sup>a</sup> )           | 15 (1)        |
|                                | Splice-site (novel <sup>a</sup> )        | 0 (0)         |
|                                | Indels                                   | 0             |
| Chromosome 18 region           | Total <sup>c</sup> (novel <sup>a</sup> ) | 14 (0)        |
|                                | Synonymous (novel <sup>a</sup> )         | 6 (0)         |
|                                | Nonsense (novel <sup>a</sup> )           | 0 (0)         |
|                                | Missense (novel <sup>a</sup> )           | 8 (0)         |
|                                | Splice-site (novel <sup>a</sup> )        | 0 (0)         |
|                                | Indels                                   | 0             |

<sup>a</sup>Number of variants not found in dbSNP129, 1000 Genomes and our in-house database of 70 exomes.

<sup>b</sup>dbSNP rate and concordance are based on dbSNP129.

<sup>c</sup>Homozygous variants.
